# Supplementary material for: Integration of perovskite and polymer photoactive layers to produce ultrafast response, ultraviolet-to-near-infrared, sensitive photodetectors
Source: Royal Society of Chemistry journal article supplement (doi:10.1039/c6mh00508j), 2016-12-21
Supplement: c6mh00508j1.pdf [file c6mh00508j1.pdf]

## Supporting Information for

### Integration of Perovskite and Polymer Photoactive Layers for Ultrafast Response, Ultraviolet-to-Near-infrared, Sensitive Hybrid Photodetectors

Liang Shen<sup>1#</sup>, Yuze Lin<sup>1#</sup>, Chunxiong Bao<sup>1</sup>, Yang Bai<sup>1</sup>, Yehao Deng<sup>1</sup>, Mengmeng Wang<sup>2</sup>, Tao Li<sup>3</sup>,

Yongfeng Lu<sup>2</sup>, Alexei Gruverman<sup>3</sup>, Weiwei Li<sup>4</sup>, Jinsong Huang<sup>\*1</sup>

<sup>1</sup>Department of Mechanical and Materials Engineering, <sup>2</sup>Department of Electrical and Computer Engineering, <sup>3</sup>Department of Physics and Astronomy, University of Nebraska–Lincoln, Lincoln, Nebraska 68588-0656, USA. <sup>4</sup>Institute of Chemistry, Chinese Academy of Sciences, 100190, China.

#### Calculation of the transit time

The transit time, which can be defined that carriers have a travel from one electrode to counter electrode under built-in potential or applied bias, was determined by equation (1):

$$t = \frac{D^2}{\mu V} \quad (1)$$

$$V = \frac{Q}{C} = \frac{Q \times D}{A\epsilon_0\epsilon_r} \quad (2)$$

Where  $t$  is the transit time,  $\mu$  is the carrier mobility,  $V$  is the partial voltage of each layer from the sum of built-in potential and applied bias. Equation (2) is a transformation of definition of a parallel-plate capacitor, it is clearly seen that  $V$  is proportional to  $D/\epsilon_r$ .

---

\*Correspondence should go to J.H. at [jhuang2@unl.edu](mailto:jhuang2@unl.edu)

Table S1 The thickness (D), dielectric constant ( $\epsilon_r$ ) and mobility ( $\mu$ ) of each layer of perovskite/polymer hybrid photodetector and the calculated transit time of the device.

|                    | D (nm) | $\epsilon_r$        | $\mu$ (cm <sup>2</sup> /Vs)         | transit time (ns) |
|--------------------|--------|---------------------|-------------------------------------|-------------------|
| PTAA               | 5      | 4.0                 | 0.01 <sup>[1]</sup>                 | 1.2               |
| MAPbI <sub>3</sub> | 500    | 32 <sup>[2]</sup>   | 30                                  | 0.16              |
| PDPPTDTPT          | 60     | 4.0                 | 8.0×10 <sup>-2</sup> <sup>[3]</sup> | 1.0               |
| BCP                | 8      | 2.91 <sup>[4]</sup> | 1.1×10 <sup>-2</sup> <sup>[5]</sup> | 0.64              |

#### Calculation of the RC time constant

The organic-inorganic hybrid perovskite (OIHP) photodetector structure can be divided into four layers between the ITO and Cu electrode. According to the definition of capacitance in series, the total capacitances are composed four branches expressed by formula (3) and (4):

$$\frac{1}{C} = \frac{1}{C_1} + \frac{1}{C_2} + \frac{1}{C_3} + \frac{1}{C_4} \quad (3)$$

$$C = A \epsilon_0 \epsilon_r / D \quad (4)$$

where  $C_1$  is from PTAA layer,  $C_2$  is from perovskite layer,  $C_3$  is from PDPPTDTPT:PCBM layer and  $C_4$  is from BCP layer, respectively. A is the device area; D is the film thickness.

Table S2 The calculated capacitances and RC time constants of the perovskite/polymer hybrid photodetectors with various device areas.

| Area(mm <sup>2</sup> )<br>C (nF) | 7    | 2     | 1     | 0.5   | 0.1   |
|----------------------------------|------|-------|-------|-------|-------|
| C <sub>1</sub>                   | 499  | 143   | 71.3  | 35.6  | 7.13  |
| C <sub>2</sub>                   | 3.96 | 1.13  | 0.566 | 0.283 | 0.06  |
| C <sub>3</sub>                   | 23.2 | 6.63  | 3.32  | 1.66  | 0.332 |
| C <sub>4</sub>                   | 22.5 | 6.43  | 3.22  | 1.61  | 0.322 |
| C <sub>total</sub>               | 2.92 | 0.835 | 0.418 | 0.209 | 0.04  |
| t (ns)                           | 147  | 41.8  | 20.9  | 10.4  | 2.09  |

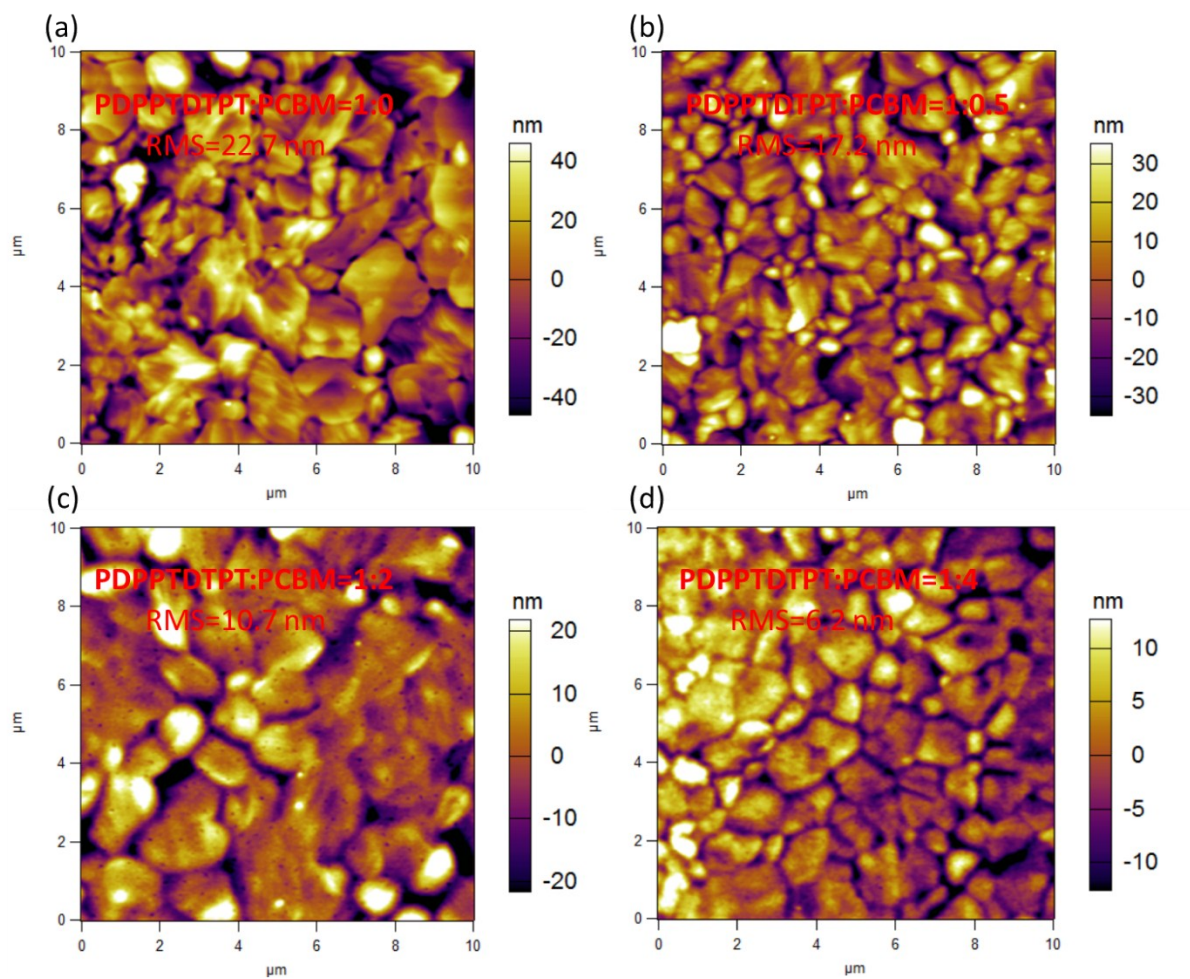

Figure S1 Atomic force microscopy images of perovskite/polymer hybrid photodetectors with various PDPPTDTPT:PCBM ratios.

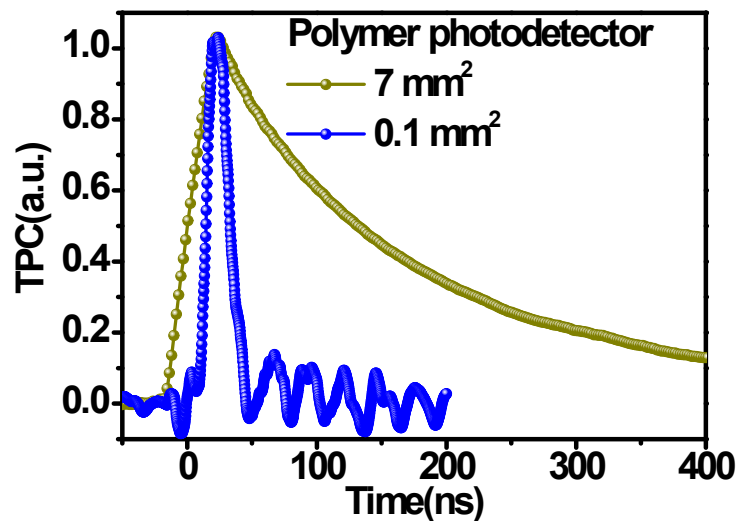

Figure S2 TPC curves of the pure polymer photodetectors with device areas of 7 mm<sup>2</sup> and 0.1 mm<sup>2</sup> under the illumination of near infrared light (800 nm). The response time of devices with areas of 7 and 0.1 mm<sup>2</sup> are 168 and 12 ns, respectively.

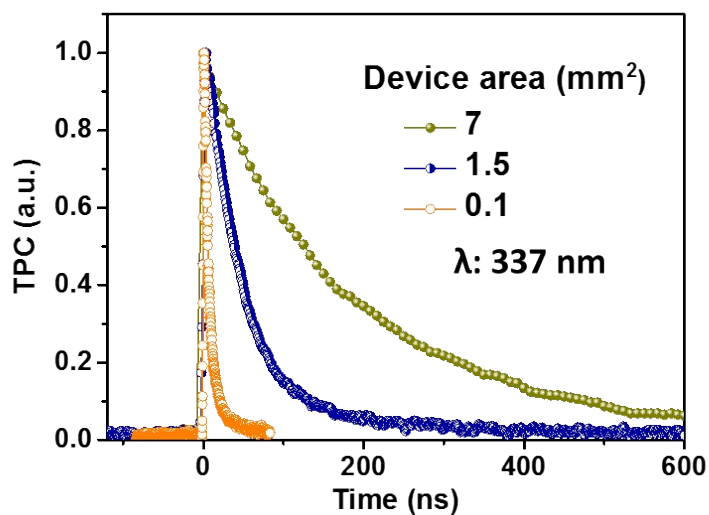

Figure S3 TPC curves of the perovskite/polymer hybrid photodetectors with device areas of 7 mm<sup>2</sup>, 1.5 mm<sup>2</sup> and 0.1 mm<sup>2</sup> under the illumination of UV light. The photocurrent decay time of

the hybrid photodetectors with device areas of 7, 1.5 and 0.1 mm<sup>2</sup> to 337 nm UV light are 186, 48.0 and 8.8 ns, respectively.

- [1] A. Castro-Carranza, J. C. Nolasco, M. Estrada, R. Gwoziecki, M. Benwadih, Y. Xu, A. Cerdeira, L. F. Marsal, G. Ghibaudo, B. Iñiguez, J. Pallarès, *IEEE Electronic Device Letters*, 2012, **33**, 1201
- [2] Q. Dong, Y. Fang, Y. Shao, P. Mulligan, J. Qiu, L. Cao, J. Huang, *Science* 2015, **347**, 967.
- [3] K. H. Hendriks, W. Li, M. M. Wienk, R. J. Janssen, *J. Am. Chem. Soc.* 2014, **136**, 12130
- [4] P. K. Nayak, N. Periasamy, *Organic Electronics*, 2009, **10**, 1396
- [5] H. Gao, C. Qin, H. Zhang, S. Wu, Z.M. Su, Y. Wang, *J. Phys. Chem. A* 2008, **112**, 9097.
